# Supplementary material for: The applications of circulating cell-free DNA for oral squamous cell carcinoma patients as non-invasive diagnostics of structural variants and fusions
Source: Research Square preprint supplement (doi:10.21203/rs.3.rs-4170051/v1), 2024-06-13
Supplement: Supplementary file 1 [file 48a2f6f581f9be4101494147.pdf]

## Supplementary Material

**Table1: Demographic information of healthy vs OSCC patients.**

**Table2: Fusion primers.**

**Table3: PCR conditions.**

**Figure S1: Bioanalyzer graph of cfDNA size of OSCC patients:** The arrow mark in black shows peak of cfDNA size in bioanalyzer graph.

**Figure S2: Fusion sequence:** the purple sequence indicates sequence of TRMO, red sequence indicates junction and blue sequence indicates TRNT1.

**Figure S3: Fusion validation in other OSCC samples:** A. Sanger sequencing of the PCR products confirmed the fusion junction in our samples with results from the ChiTaRS fusion database. B. Agarose gel image of fusion (highlighted by the red box) identification in other patients' cfDNA after PCR.

**Figure S4: Coding potential of the fusion sequence.** A. The CPAT score suggests that fusion to be non-coding. B. The CNIT result was also used to validate the coding potential and likewise suggests that the fusion gene is a non-protein coding sequence.

**Table1A: Demographic parameters of healthy vs OSCC patients.**

| Details             | Healthy                            | OSCC Patients                      |
|---------------------|------------------------------------|------------------------------------|
| Gender              | Male: 10 (40%)<br>Female: 15 (60%) | Male: 14 (47%)<br>Female: 16 (53%) |
| Age (mean)          | 52.90526                           | 58.25306                           |
| cfDNA concentration | Mean 1.04<br>Median 1.2            | Mean 23.72<br>Median 22.83         |

**Table1B: Details of OSCC patients.**

| OSCC Patients         | cfDNA>0.3 ng/□l<br>(N=30)                                                     |
|-----------------------|-------------------------------------------------------------------------------|
| Smoking status        | Current – 7<br>Past – 4<br>Never – 19                                         |
| Alcohol abuse         | NA                                                                            |
| Diabetes Mellitus     | Present: 9 (30%)<br>Absent: 21 (70%)                                          |
| IHD                   | Present: 5 (16%)<br>Absent: 25 (84%)                                          |
| S/P CVA               | Present: 3 (10%)<br>Absent: 27 (90%)                                          |
| Other past malignancy | Present: 7 (23%)<br>Absent: 23 (77%)                                          |
| Primary site          | Tongue – 20 (67%)<br>Alveolar ridge – 8 (27%)<br>FOM – 1 (3%)<br>RMT – 1 (3%) |
| Ki67                  | Positive: 16 (53%)                                                            |
| P53                   | Positive: 14 (47%)                                                            |
| Keratinization        | Present: 20 (67%)                                                             |
| P16                   | Positive: 3 (10%)                                                             |

**Table2: Fusion primers:**

|         |                      |
|---------|----------------------|
| Forward | CTCCTGAGAACCACCAGACA |
| Reverse | GCTGCACCCCACTAATGTGT |

**Table 3: PCR conditions.**

|                      |       |        |             |
|----------------------|-------|--------|-------------|
| Initial denaturation | 95 °C | 2 mins | } 28 cycles |
| Denaturation         | 95 °C | 25 sec |             |
| Annealing            | 53°C  | 35 sec |             |
| Extension            | 72 °C | 60 sec |             |
| Final Extension      | 72 °C | 5 mins |             |
| Hold                 | 4°C   | ∞      |             |

Figure S1.

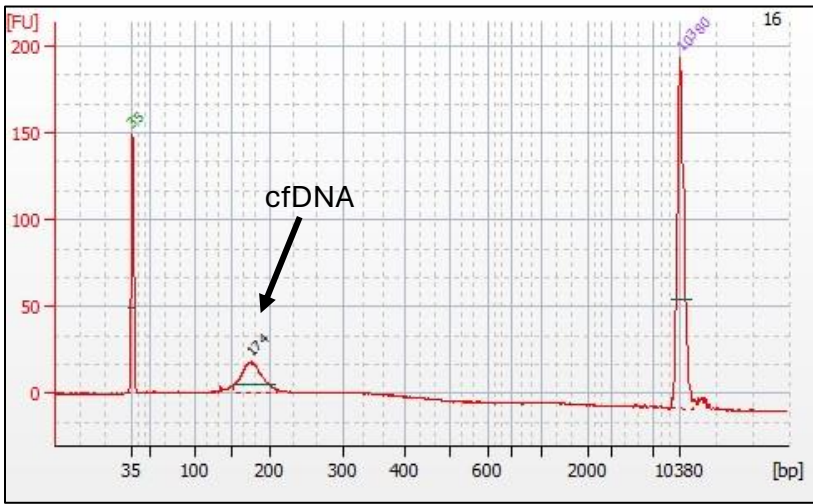

Figure S2.

```
GGGGCTGGAGGAGCCGGGGCCTCGGCCTACAGCGACCCCGTGCGGCTGCGTGAAGCCGGCTCTGGAGACAG
GGAATCTTTAACTGAGCCAGTCGGCTACTTGAATCTTGTTTCTCGGCCAAGAATGGTACTCCAAGACAGCCAT
CCATTTGTAGCTATTCTCGAGCCTGTTTGAGGATTAGAAAGAGGATCTTTAATAATCCTGAACATTCTTGATGG
GCCTAGAACAGTTTTCTCATGTTTGGATTTGTTTGTTCACAAAAACGGTCATTTGAGCTGTAAGGCAAAAGT
GCAGCCTCTAGGCTGAATGGTGCAAAGACTGGAGTTTTTCCACAAGGAGCCCTCATCGTCCCAATGCAATAG
GACTGACCCTGGCCAAGCTGGAAAAGGTAGAAGGTAACCCATTTCACTTTTACCTTTTCTCACCCAAA
AAAGCCTTATAAAATAAACAGCATTCACTGCTGTTTATTGAGACGAGTACCAATGATGTTAACTCCTGAGA
ACCACCAGACATTGAAGAAAATACAATGATTGGGGGGAGGGATAGTATTGGGAGATATACCTAATGCTAGATG
ACACATTAGTGGGGTGACGCGACCAGCATGGCACATGTATACCTATGGTAACTAACCTGCACAATGGTGCAC
ATGTTACCCCTAAACCTTAGAGGTATAATTAACAAAAAACACAAAAAGAAGT
```

Figure S3.

A.

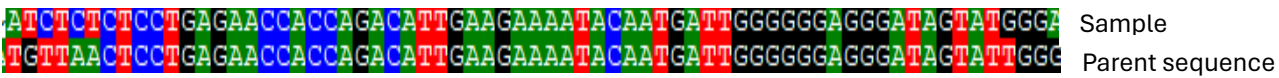

B.

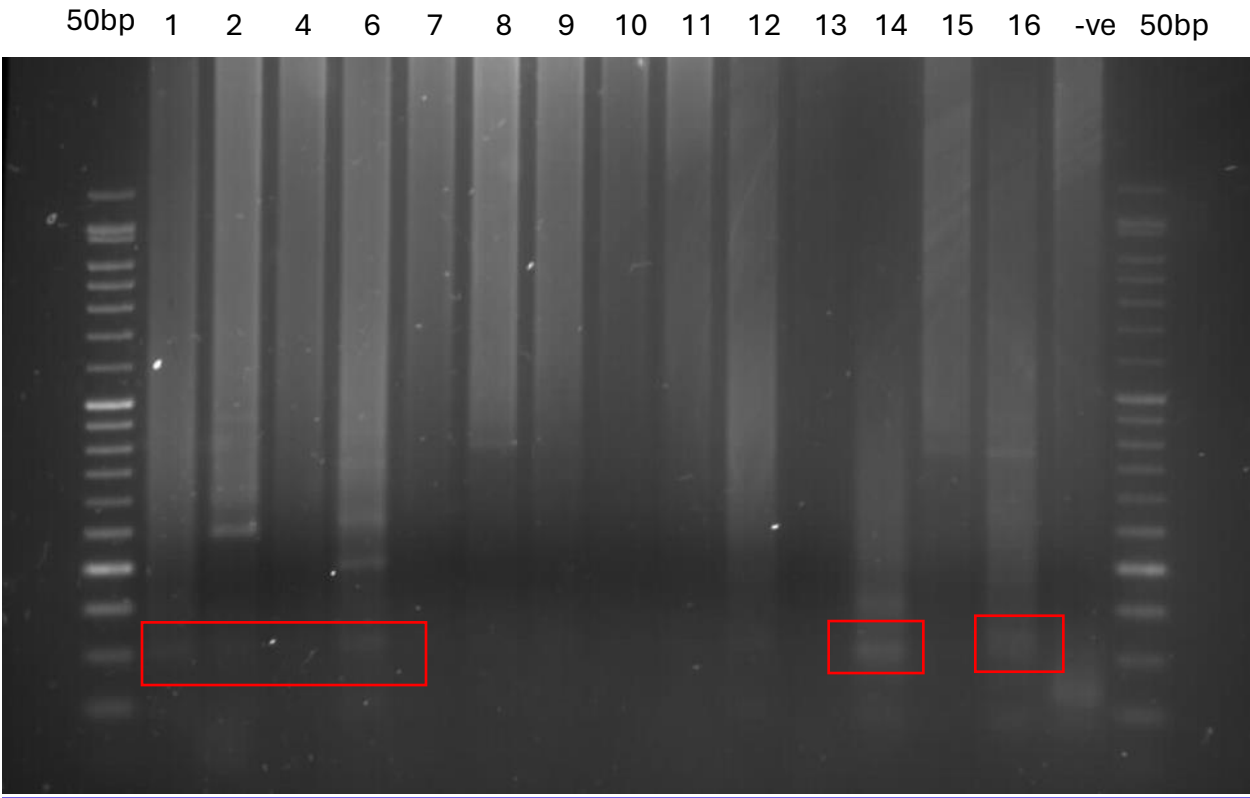

Figure S4.

A.

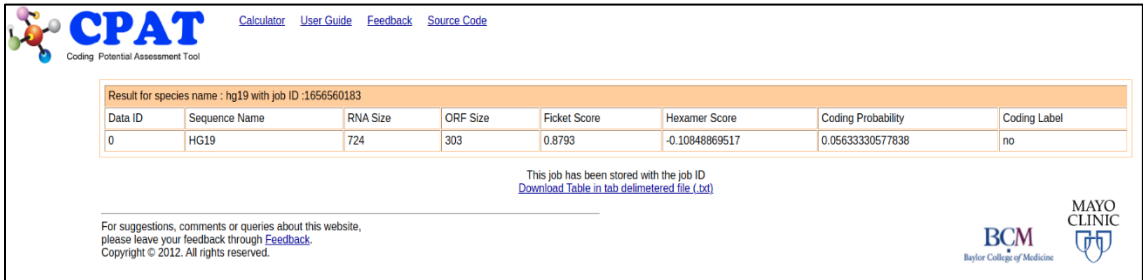

B.

### CNIT Score Detail Plot

Red line represents the correct transcriptional reading frame and other five lines (blue or green) represent other five reading frames. Green line indicates the distribution of the coverage (the right y-axis) of the MLCDS region for each transcript across the normalized length.

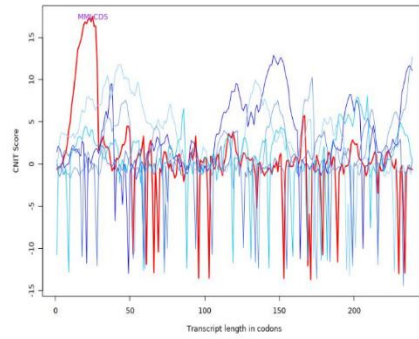

MLCDS: The most-like CDS region

Codon length: The total length of the identified sequence converted to codons length (the identified sequence length/3).

Blast the sequence in NONCODE

Run
